1 Analysis of High Molecular Weight RNA-induced silencing complex (HMW-RISC) in  
2 CD8<sup>+</sup> T cells identifies miR-7 as a modulator of T cell activation

3 Matilda Toivakka, Katrina Gordon, Sujai Kumar, Rose Zamoyska\* and Amy Buck\*

4

5 Institute of Immunology & Infection Research, School of Biological Sciences,  
6 University of Edinburgh, Edinburgh, EH9 3FL

7 \*To Whom Correspondance should be addressed: [Rose.Zamoyska@ed.ac.uk](mailto:Rose.Zamoyska@ed.ac.uk)

8 [a.buck@ed.ac.uk](mailto:a.buck@ed.ac.uk)

9 ABSTRACT

10 Increasing evidence suggests mammalian Argonaute (Ago) proteins partition into  
11 distinct complexes within cells, but there is still little functional understanding of the  
12 miRNAs differentially associated with these complexes. In naive T cells, Ago2 is found  
13 almost exclusively in low molecular weight (LMW) complexes which are associated  
14 with miRNAs but not their target mRNAs. Upon T cell activation a proportion of these  
15 Ago2 complexes move into a newly formed HMW RISC which is characterized by the  
16 presence of the GW182 protein that mediates translational repression. To identify the  
17 miRNAs expected to be potent in suppressing targets, we followed HMW RISC  
18 formation upon activation of CD8<sup>+</sup> T cells. We show that while most miRNAs distribute  
19 between HMW and LMW RISC in activated T cells, several miRNAs were dominant in  
20 one complex over the other. Among these, miR-7 is enriched in HMW RISC and  
21 inhibition of miR-7 upon T cell activation leads to increased production of IL-2 and  
22 expression of IL-2-regulated proteins including the  $\alpha$ -subunit of the IL-2 receptor,  
23 CD25; transferrin receptor, CD71; and amino acid transporter, CD98, which are direct  
24 miR-7 targets. Our data support a model where recruitment of miR-7 to HMW RISC

25 restrains IL-2 signalling and the metabolic processes regulated by IL-2 and thus  
26 modulates T cell activation.

27

28

## 29 INTRODUCTION

30 miRNAs are ~22 nucleotide small non-coding RNAs that bind to Argonaute (Ago)  
31 proteins within RNA induced silencing complexes (RISC). RISCs can form either low  
32 molecular weight (LMW) or high molecular weight (HMW) complexes depending on  
33 their interactions with other proteins (Höck et al., 2007; Landthaler et al., 2008;  
34 Olejniczak et al., 2013). HMW RISCs include mRNA binding proteins, RNA helicases,  
35 ribosomal proteins and proteins involved in gene silencing such as the trinucleotide  
36 repeat containing 6 (TNRC6) family of proteins. GW182 (TNRC6A), TNRC6B and  
37 TNRC6C are thought to be functionally redundant and bind Ago2 through the N-  
38 terminus whereas the C-terminal domains recruit other mRNA binding proteins and  
39 metabolism factors, including poly(A) binding proteins, deadenylases and decapping  
40 proteins that cause translational repression and degradation of the target mRNA  
41 (Behm-Ansmant et al., 2006; Eulalio et al., 2008; Fabian and Sonenberg, 2012;  
42 Lazzaretti et al., 2009; Lian et al., 2009). Accordingly HMW RISC was shown to be  
43 associated with ribosomes and contained the machinery required for miRNA target  
44 suppression (La Rocca et al., 2015).

45 In contrast to most cell lines, resting primary cells, including naive T cells, contain  
46 predominantly LMW RISC complexes and express little if any GW182 protein (La  
47 Rocca et al., 2015). Upon stimulation by mitogenic signalling (Olejniczak et al., 2013)  
48 or T cell receptor (TCR) signalling (La Rocca et al., 2015) the GW182 protein is  
49 induced and interacts with Ago protein to promote the formation of HMW RISC. On  
50 the premise that only HMW RISC complexes contain miRNAs that are engaged with  
51 mRNA targets, we sought to identify miRNAs associated with HMW RISC and study  
52 their functions in CD8<sup>+</sup> T cells. Using OT-I TCR transgenic mice we stimulated CD8<sup>+</sup>

53 T cells with their physiological peptide ligands and followed the induction of GW182  
54 protein and the formation of HMW RISC. Sequencing of HMW RISC-associated  
55 miRNAs identified miR-7 as a key miRNA in CD8<sup>+</sup> T cells that functions to modulate  
56 production of Interleukin-2 (IL-2) and proteins downstream of IL-2 that are involved in  
57 T cell growth and nutrient uptake.

## 58 RESULTS

### 59 Ago2 forms HMW RISC with GW182 in activated CD8<sup>+</sup> T cells

60 In order to examine miRNA expression and formation of RISC during CD8 T cell  
61 activation, we utilised OT-I CD8<sup>+</sup> T cells that express an ovalbumin-reactive transgenic  
62 T-cell receptor (TCR) and respond to the ovalbumin-derived agonist peptide SIINFEKL  
63 (N4). Antigen stimulation drives activation of naive CD8<sup>+</sup> T cells, promoting  
64 transcription and translation of many genes and proteins, including transient  
65 expression of the cytokine IL-2, which plays important roles in promoting proliferation  
66 and T cell differentiation. To sustain proliferation and to generate fully differentiated  
67 cytotoxic lymphocytes (CTLs), additional exogenous IL-2 cytokine was added to the  
68 cultures on day 2 (d2) and d4 (Fig1A).

69 To observe the dynamics of association between Ago2 and GW182, we  
70 immunoprecipitated Ago2 from naive and activated OT-I cells and detected both  
71 proteins by western blotting. GW182 co-immunoprecipitated with Ago2 from activated  
72 T cells as expected (La Rocca et al., 2015) and the two proteins remained associated  
73 during 6 days of culture, with a slight decrease in the amount of GW182 relative to  
74 Ago2 protein after day 2 (Fig1B-C). Two isoforms could be detected for GW182, with  
75 the shorter isoform predominantly immunoprecipitating with Ago2 particularly at the  
76 later time points (Fig1B-C). To further investigate this interaction, we

77 immunoprecipitated Ago2 and GW182 from naive and activated T cells and performed  
78 a western blot of both the IP and unbound fractions. As before, Ago2 was efficiently  
79 immunoprecipitated from both naive and activated T cells, whereas only the shorter  
80 isoform of GW182 co-immunoprecipitated with Ago2 from the activated T cells  
81 (Fig1D). The reciprocal GW182 IP showed Ago2 in naive T cells remained in the  
82 GW182-unbound fraction, while activated T cells contained both GW182 bound and  
83 unbound Ago2 (Fig1D). We then used size exclusion chromatography to confirm that  
84 the GW182-bound Ago2 corresponded to a HMW RISC as described previously (La  
85 Rocca et al., 2015). As expected, all the detectable Ago2 in naive T cells was found  
86 in LMW fractions (Fig1E). In activated cells however, Ago2 was found in multiple  
87 fractions, which we define as low, intermediate and high molecular weight (Fig1F). We  
88 immunoprecipitated Ago2 from pooled fractions corresponding to HMW, two pools of  
89 intermediate fractions and LMW RISC from activated cells (as indicated in Fig1F), and  
90 LMW RISC from naive cells. As shown in Fig1G, GW182 co-immunoprecipitated with  
91 Ago2 in the HMW fractions and possibly some intermediate fractions from activated  
92 cells, but not in the LMW fractions (Fig1G). These data confirm that Ago2 and GW182  
93 form HMW RISC in activated CD8<sup>+</sup> T cells, with a fraction of Ago2 remaining GW182-  
94 unbound in LMW RISC.

#### 95 Specific miRNAs are enriched in HMW RISC

96 In order to determine the miRNAs associated with HMW RISC versus LMW RISC in  
97 activated CD8<sup>+</sup> T cells we sequenced the small RNAs from immunoprecipitated Ago2  
98 of each fraction (Supp. Fig1). The data were normalised to total read counts and the  
99 HMW and LMW RISC miRNAs were compared by differential expression analysis. We  
100 detected a total of 677 miRNAs of which 299 were analysed (based on criteria of

101 average counts per million (CPM) > 4). In this dataset, 23 miRNAs were significantly  
102 enriched in HMW RISC with over 4-fold enrichment (FDR < 0.01) and 28 were  
103 enriched in LMW RISC (Fig2A, and Supplementary data 1).

104 To compare the miRNA distributions between HMW and LMW RISC with total changes  
105 in miRNA upon T cell activation, we immunoprecipitated (IP) Ago2 from naive CD8<sup>+</sup> T  
106 cells, and cells activated with peptide for 2 days (prior to addition of IL-2). As expected  
107 from published data, sequencing analysis of the IP eluants revealed dynamic changes  
108 in the miRNAs associated with Ago2 upon activation (Supp. Fig2A). We validated the  
109 upregulation of miR-155 and miR-17, and downregulation of miR-150, miR-139 and  
110 miR-181 by qPCR from total cellular RNA during a time-course of activation (Supp.  
111 Fig2B-C). These results are consistent with previous reports which showed  
112 differences in the total miRNA population in T cell subsets during activation  
113 (Rodríguez-galán et al., 2018).

114 At a global level the enrichments of specific miRNAs in LMW or HMW RISC did not  
115 appear to correlate with overall abundance of the miRNAs, or changes in their  
116 expression upon activation (Supp. Fig3A-C). For example, of the miRNAs enriched in  
117 HMW RISC, miR-7 and miR-210 were strongly upregulated as shown by higher CPM  
118 in the Ago2 IP from activated T cells compared to Ago2 IP from naive cells (Fig2B-C)  
119 in contrast to miR-378c and let-7g that were downregulated (Fig2D-E) upon activation.  
120 Interestingly, we observed that members of the same miRNA families characterised  
121 by a shared seed sequence displayed the same pattern in terms of enrichment in  
122 HMW versus LMW RISC (Supp. Fig3D-E).

123 Role of miR-7 in T cell activation

124 We hypothesised that HMW RISC enriched miRNAs would be actively engaged in  
125 target repression and focused on one of the miRNAs identified from these data, miR-  
126 7, for further investigation. miR-7 was significantly upregulated upon activation and  
127 one of the most enriched miRNAs in HMW RISC but has not been described  
128 previously to have a specific function in T cells (Gagnon and Ansel, 2019). In cancer  
129 cells however, miR-7 has been shown to be tumour-suppressive and has, for example,  
130 been shown to target components of the mammalian target of rapamycin (mTOR)  
131 pathway (Fang et al., 2011; Wang et al., 2013; Zhao et al., 2015). To study the function  
132 miR-7 in CD8<sup>+</sup> T cells, we used a locked nucleic acid (LNA) inhibitor that was delivered  
133 to the naive T cells at the time of activation. Using flow cytometry, we could  
134 demonstrate efficient uptake of the fluorescently labelled miR-7 inhibitor on d1 and d2  
135 post activation of the cells (Supp. Fig4A). Trypsin treatment prior to flow cytometry  
136 reduced the signal for the surface co-receptor CD8 $\beta$  but caused only a slight decrease  
137 in the fluorescent signal from the inhibitors, consistent with their internalisation (Supp.  
138 Fig4B). Cell viability was not affected by the uptake of the miR-7 inhibitor or a control  
139 inhibitor (Supp. Fig4C).

140 We followed whether the T cell response to stimulation was altered by the inhibitors  
141 by measuring cell proliferation, cell size, expression of surface markers and of  
142 transcription factors by flow cytometry. Two days after activation, the cells had  
143 proliferated at a comparable rate (Supp. Fig4D). Naive T cells increase their size upon  
144 activation proportionally to the strength of stimulation, which can be measured by  
145 increases in forward scatter (FSC) profiles by flow cytometry. On d2 N4 stimulated  
146 cells receiving the miR-7 inhibitor were found to be slightly larger, indicative of greater  
147 cellular mass (Supp. Fig4E). We measured the expression of various receptors which  
148 are activated upon T cell stimulation and regulate cell growth, such as the IL-2 receptor

149 alpha chain, CD25, the surface activation marker, CD69, the transferrin receptor,  
150 CD71, and the amino acid transporter, CD98, one and two days after activation in the  
151 absence or presence of the inhibitors. On d2 the cells receiving the miR-7 inhibitor  
152 specifically expressed higher levels of CD25, CD69, CD71 and CD98 whereas  
153 expression of a control surface receptor, CD8 $\beta$ , was unchanged (Fig3A). We also  
154 measured the expression of the transcription factors Irf4, T-bet and c-Myc, that  
155 regulate CD8<sup>+</sup> T cell activation, metabolism and differentiation to effector cells. The  
156 cells receiving the miR-7 inhibitor consistently showed increased expression of c-Myc,  
157 and to a lesser extent Irf4, with no change in the expression of T-bet (Fig3B).

158 Naive T cell activation is a multistep process with the initial signals being delivered by  
159 engagement of the TCR and co-stimulatory molecules, while subsequent growth and  
160 effector cell differentiation is largely driven by the response to cytokines such as IL-2  
161 (Ross and Cantrell, 2018). Since inhibition of miR-7 had no effect on the activation  
162 phenotype of the T cells on d1 (data not shown) but had strong phenotypic changes  
163 at d2, we hypothesised that miR-7 may be important in downregulating the IL-2  
164 pathway. Although the CD25 component of the high affinity IL-2R is induced by TCR  
165 stimulation initially, its expression is subsequently maintained by, and proportional to,  
166 the availability of IL-2 to the cell (Kim et al., 2006). Both TCR signals and IL-2  
167 contribute to the upregulation of CD98 that interacts with LAT1, and potentially CD69,  
168 to form the system L ('leucine preferring system') amino acid transporter responsible  
169 for large neutral amino acid (LNAA) uptake in activated T cells (Cibrian et al., 2016;  
170 Sinclair et al., 2013). Key metabolic regulators such as the mTOR complex 1  
171 (mTORC1) and c-Myc, that regulates the expression of glucose, glutamine and  
172 transferrin receptors, are also regulated by IL-2 signalling and system L amino acid  
173 uptake (Howden et al., 2019; Preston et al., 2015; Rollings et al., 2018).



174 To determine the effect of miR-7 on IL-2 signaling we used Janus kinase (JAK)  
175 inhibitor tofacitinib, which blocks signalling downstream of the IL-2 receptor. The  
176 addition of the JAK inhibitor on d1 caused a complete downregulation of CD25 and a  
177 strong reduction in the expression of CD69, CD71 and CD98, as expected since IL-2  
178 is important in maintaining production of these proteins (Supp. Fig4F) (Rollings et al.,  
179 2018). Addition of the JAK inhibitor lessened the phenotypic differences between miR-  
180 7-inhibited and control cultures (Fig4A) and was consistent with a slight but statistically  
181 significant increase in IL-2 production which was observed in the presence of the miR-  
182 7 inhibitor (Fig4B). These data indicate that miR-7 dampens the production of IL-2  
183 following TCR stimulation, which in turn modulates the expression of a number of  
184 downstream molecules by d2 of activation. However, following inhibition of JAK;  
185 CD25, CD69, CD71 and to a lesser extent CD98 and c-Myc were still more highly  
186 expressed in the presence of the miR-7 inhibitor (Fig4A), consistent with the 3'UTRs  
187 of most of these genes containing binding sites for miR-7 (Fig. 4C) and previous  
188 validation of miR-7 targets CD71 and CD98 in cell lines (Miyazawa et al., 2018;  
189 Nguyen et al., 2010). Together these findings indicate that miR-7 regulates the  
190 pathways controlling IL-2 signalling in CD8<sup>+</sup> T cells on multiple levels, impacting IL-2  
191 production, expression of the IL2 receptor CD25, amino acid uptake through CD98  
192 and transferrin uptake by CD71 (Fig4D).

## 193 DISCUSSION

194 The abundance of a miRNA in a cell has historically been taken as an indication of its  
195 functional importance. However many recent observations across plant and animal  
196 systems do not fit this dogma and suggest miRNAs can exist in distinct RISCs with  
197 different functional properties (Dalmadi et al., 2019; Flores et al., 2014; Olejniczak et

198 al., 2013; Powell et al., 2020; La Rocca et al., 2015; Wu et al., 2013). In T cells HMW  
199 RISC association was previously shown to correlate with increased miRNA  
200 suppressive capacity: members of the let-7 and miR-16/15 families were shown to be  
201 more repressive for a reporter construct in activated, compared to naive T cells,  
202 despite downregulated expression (La Rocca et al., 2015). Consistent with these  
203 studies, by sequencing HMW and LMW RISC associated miRNAs from activated  
204 CD8<sup>+</sup> T cells we found that, while most miRNAs could be detected from both  
205 complexes, some were dominant in one over the other. This suggests that the  
206 importance of a miRNA in canonical suppression of mRNA targets may have more to  
207 do with its association with HMW RISC than its overall abundance in the cell. We  
208 demonstrate that one of the most enriched miRNAs in HMW RISC is miR-7 and show  
209 for the first time that this miRNA plays a key role in regulating T cell activation. This  
210 regulation acts on CD25, CD69, CD71, CD98, c-Myc and Irf4, which are all interlinked  
211 in their roles in sustaining T cell activation through promoting amino acid uptake and  
212 signalling downstream of the IL-2, c-Myc and mTOR pathways (Fig4C-D). We show  
213 that CD25, CD71 and CD98 contain direct seed-based target sites for miR-7 in their  
214 3'UTRs, and speculate that additional targets may exist to explain the altered  
215 production of IL-2 itself. miR-7 therefore has the potential to restrict IL-2 production  
216 and several molecules downstream of IL-2 signalling to limit the extent of T cell  
217 activation. This could be important in conditions of persistent inflammation to avoid T  
218 cell exhaustion (Gaud et al., 2018; Wherry and Kurachi, 2015).

219 Interestingly, in T cells GW182 expression and HMW RISC formation is at least partly  
220 regulated by mTOR signalling following T cell activation (La Rocca et al., 2015). We  
221 propose therefore that formation of HMW RISC following mTOR signalling is one  
222 feedback pathway to regulate T cell activation through miR-7 and potentially other

223 miRNAs. Indeed the formation of HMW RISC is likely to be important to regulate  
224 signalling in a range of other contexts and is dynamically regulated by mitogenic  
225 signals, with the deprivation of growth factors or glucose causing decreased  
226 expression of GW182 and formation of a LMW RISC in cell lines (Olejniczak et al.,  
227 2013). We do not rule out that LMW RISC could have functional properties, for  
228 example to direct cleavage of targets that are highly complementary to miRNAs in  
229 Ago2, which has endonuclease activity. However this requires further characterization  
230 in T cells.

231 The question of if, or how, miRNAs are selectively recruited to HMW RISC is not  
232 understood currently. In CD8<sup>+</sup> T cells the presence in HMW versus LMW RISC did not  
233 depend of the total abundance of the miRNA nor correlate with the level of miRNA up-  
234 or down-regulation (Supp. Fig3A-C). The distribution of miRNAs between HMW and  
235 LMW RISC could however be influenced by the availability of miRNA targets, which  
236 changes dramatically upon T cell activation due to changes in transcription and  
237 shortening in 3'UTR of certain transcripts (Sandberg et al., 2008). Overexpression of  
238 a mRNA containing miRNA target sites has been shown to increase the RISC-  
239 association of that miRNA (Flores et al., 2014). In support of this hypothesis, we found  
240 that miRNAs with identical seed sites and overlapping targets were found together in  
241 HMW RISC (Supp. Fig3D-E). For example, members of the miR-17 family, which  
242 regulate CD8<sup>+</sup> T cell proliferation and cell differentiation, were found upregulated and  
243 enriched in HMW RISC (Supp. Fig3D-E) (Khan et al., 2013; Wu et al., 2012). Similarly,  
244 miR-449a and miR-449c that share a seed site with miR-34a, were upregulated and  
245 enriched in HMW RISC (Supp. Fig3D-E). We also found that, in agreement with  
246 previous results (La Rocca et al., 2015), members of the let-7 family were  
247 downregulated overall upon T cell activation but enriched in HMW RISC (Supp. Fig3D-

248 E). It remains possible however that other factors, including modifications of miRNAs  
249 (e.g. non-template nucleotide addition) could also influence miRNA loading to Ago and  
250 assembly of RISC (Gebert and MacRae, 2019). Ago can also be modified on various  
251 residues to regulate its subcellular localisation, association with GW182, loading and  
252 turnover of miRNA and mRNAs (Bridge et al., 2017; Golden et al., 2017; Horman et  
253 al., 2013; Rüdél et al., 2011; Zeng et al., 2008). Other RNA-binding proteins may also  
254 interact with specific miRNAs or targets to influence RISC formation (Krol et al., 2010).

255 In summary, we have confirmed the presence of LMW RISC in CD8<sup>+</sup> T cells and the  
256 induction of HMW RISC when these are stimulated with antigenic peptide. We have  
257 shown enrichment of specific miRNAs and miRNA families in HMW RISC and  
258 demonstrated that one of these, miR-7, is a novel regulator of T cell activation and  
259 metabolism that suppresses IL-2 signalling and nutrient uptake. There remain open  
260 questions in regard to the function, composition and recruitment of miRNAs to HMW  
261 RISC, but our data show that focusing on miRNAs enriched within HMW RISC can  
262 lead to identification of new functionally relevant miRNAs, whose importance could be  
263 overlooked if only focusing on abundance levels.

## 264 METHODS

265

### 266 **Mice & Primary cell cultures**

267 All mice were maintained and bred in pathogen-free conditions at the University of  
268 Edinburgh animal facilities in accordance with the UK Home Office and local ethically  
269 approved guidelines. OT-I transgenic mice (Hogquist et al., 1994) on the Rag-1KO  
270 C57BL/6 genetic background were used, as well as OT-I mice containing a tagged  
271 Ago2 knock-in (Schmolka et al., 2018) for the experiments shown in Figures 1 and 2,  
272 and Supplementary Figures 1-3. Mice were used at 7-12 weeks of age and animal sex  
273 was not expected to have a significant influence on outcomes. Single cell suspensions

274 were prepared mechanically from mouse lymph nodes using a 70  $\mu$ m filter. Cells were  
275 grown in Iscove's Modified Dulbecco's Medium (IMDM, Sigma Aldrich) supplemented  
276 with 10% Heat inactivated Foetal Calf Serum (FCS, Gibco), 100 U/mL Streptomycin  
277 (Gibco), 100  $\mu$ g/mL penicillin (Gibco), 2 mM L-glutamine (Gibco) and 50  $\mu$ M  $\beta$ -  
278 mercaptoethanol. The cells were grown at 37 °C.

### 279 **T cell culture**

280 To activate OT-I cells,  $2 \times 10^6$  cells/mL were grown in media supplemented with 10nM  
281 N4 for 2 days. For effector cell differentiation, cells were activated with N4 as before  
282 for two days, then resuspended at  $2 \times 10^5$  cells/mL in media supplemented with  
283 20ng/mL IL-2 (PeproTech). miRNA inhibitors (miRCURY LNA miRNA power inhibitor  
284 with or without 5'-FAM, Qiagen) were added directly to culture media at the time of  
285 activation and were taken up by the cells by spontaneous translocation across the cell  
286 membrane. 500nM miRNA inhibitor (mmu-mir-7a-5p) or control inhibitor (negative  
287 control A) was added to naive T cells in cell culture media with N4, and phenotype was  
288 assessed on d1 and d2. For JAK inhibition, tofacitinib (Stratehc) was added to the  
289 cultures on d1 at a final concentration of 200nM and cell phenotype was measured on  
290 d2.

### 291 **Flow cytometry**

292 To measure cell proliferation, cells were stained with CellTrace Violet cell proliferation  
293 kit (Thermo Scientific) prior to culturing. Flow cytometry staining was undertaken in  
294 96-well round-bottom plates with a minimum of 200,000 cells per well. To distinguish  
295 live cells, the cells were stained with LIVE/DEAD Fixable Aqua dead cell stain kit  
296 (Thermo Scientific). For surface staining, the cells were incubated in FACS buffer (2.5%  
297 FBS and 0.05% sodium azide in PBS) with labelled antibodies, all Thermo Scientific  
298 unless otherwise indicated: anti-CD8 $\beta$ , anti-CD25, anti-CD69 (BioLegend), anti-CD71

299 (BioLegend) and anti-CD98. Intranuclear staining was done using the eBioScience  
300 Foxp3 / Transcription Factor Staining Kit (Thermo Scientific) and anti-Irf4, anti-T-bet  
301 and anti-c-Myc (Cell Signaling) antibodies. Flow cytometry was performed on  
302 MacsQuant Analyzer 10. Flow cytometry data were analysed using FlowJo 10  
303 software. Flow cytometry data were generated within the Flow Cytometry and Cell  
304 Sorting Facility in Ashworth, King's Buildings at the University of Edinburgh.

### 305 **ELISA**

306 To measure IL-2 production, cells were cultured in the presence of an anti-CD25  
307 blocking antibody (2BScientific, PC61). IL-2 was measured from culture supernatants  
308 using a mouse IL-2 ELISA kit (Thermo Scientific).

### 309 **Western blotting**

310 Cells were lysed in lysis buffer (50mM Tris/HCl pH=7.8, 300mM NaCl, 1% Triton X100,  
311 5mM EDTA, 10% glycerol) containing protease inhibitors (cOmplete protease inhibitor  
312 cocktail tablets, Roche), and if required, RNase inhibitors (RNasin Ribonuclease  
313 inhibitor, Promega). Cell lysates were denatured in LDS sample buffer (Thermo  
314 Scientific) containing 10%  $\beta$ -mercaptoethanol at 95°C. Proteins were fractionated on  
315 4-12% Bis-Tris gels (NuPAGE, Thermo Scientific) and transferred onto PVDF  
316 membranes (Immobilon-FL, Merck) using the wet-transfer method. The membrane  
317 was incubated with an Ago2 antibody (a generous gift from Dónal O'Carroll) or  
318 GW182 antibodies (Bethyl laboratories, A302-329A) then secondary labelled anti-  
319 mouse IgG (IRDye 800CW, Li-cor) or anti-rabbit IgG (Alexa Fluor 680, Thermo  
320 Scientific) antibodies in Odyssey blocking buffer containing 0.1% Tween-20 (Li-cor).  
321 The membrane was scanned using the Odyssey Clx imaging system (Li-cor). Western  
322 blot data were analysed using ImageStudioLite (Li-cor).

### 323 **Immunoprecipitations**

324 Immunoprecipitations were undertaken using magnetic Protein G Dynabeads (Thermo  
325 Scientific) conjugated with anti-Ago2 or anti-GW182 antibodies. Cell lysates were  
326 incubated with the beads overnight after which the unbound fraction was collected.  
327 The beads were then washed using the following conditions: 1x LS-IP wash (50mM  
328 Tris/HCl pH= 7.5, 0.3M NaCl, 5mM MgCl<sub>2</sub>, 0.5% Triton x100, 2.5% glycerol), 2x HS-  
329 IP wash (50mM Tris/HCl pH=7.5, 0.8M NaCl, 10mM MgCl<sub>2</sub>, 0.5% Triton x100, 2.5%  
330 glycerol), 1x LS-IP wash, 1x PNK wash (50mM Tris/HCl pH=7.5, 10mM MgCl<sub>2</sub>, 0.5%  
331 Triton X100, 50mM NaCl). The IP-bound fraction was eluted by resuspending the  
332 beads in LDS sample buffer (Thermo Scientific) containing 10% β-mercaptoethanol  
333 and incubating at 70°C for 10 min with shaking.

### 334 **Size exclusion chromatography**

335 Cells were flash-frozen in liquid nitrogen and lysed in 0.5 mL Superose 6 buffer  
336 (150mM NaCl, 10mM Tris/HCl pH=7.5, 2.5mM MgCl<sub>2</sub>, 0.01% reduced Triton x100,  
337 1mM DTT) for 20 min. The lysate was cleared by centrifugation at top speed and  
338 filtering through a 20µm filter. Protein concentration was measured with Qubit 3.0  
339 fluorometer (Thermo Scientific) using the Qubit Protein Assay kit (Thermo Scientific).  
340 Size exclusion chromatography was performed at the Edinburgh Protein Production  
341 Facility. The sample was loaded on the Superose 6 column, washed with Superose 6  
342 buffer (omitting DTT) and 0.5mL fractions were collected. Protein was extracted from  
343 the fractions by trichloroacetic acid (TCA) precipitation.

### 344 **Reverse transcription and qPCR**

345 RNA was extracted from cells in Trizol reagent (Thermo Scientific) using the Direct-  
346 zol kit (Zymo Research). The RNA was reverse transcribed to cDNA using the  
347 miScript RT kit (Qiagen). miRNAs were quantified using miScript Primer Assays

348 (Qiagen) and QuantiText SYBR Green PCR Master Mix (Qiagen) on a LightCycler  
349 480 Instrument II (Roche). qPCR data were analysed in Microsoft Excel. Data were  
350 first normalised to snRNA U6, then calculated as fold change to naive, using the  
351  $\Delta\Delta\text{Ct}$  value method.

### 352 **Small RNA library preparation**

353 For small RNA library preparation, RNA was isolated from Ago2-IP samples, as well  
354 as the IP input and unbound samples. The samples were resuspended in QIAzol lysis  
355 reagent and RNA was extracted using the RNeasy kit (Qiagen) and eluted in 100 $\mu\text{l}$   
356 dH<sub>2</sub>O. The RNA was then ethanol precipitated by adding 2.5 x volume 100% ethanol,  
357 30 $\mu\text{l}$  sodium acetate and 1 $\mu\text{l}$  GlycoBlue Coprecipitant (Thermo Scientific) to the  
358 samples which were then incubated overnight at -20°C. The following day, the  
359 samples were centrifuged at full speed for 30 min, then washed twice with 70%  
360 ethanol. The pellets were air-dried on ice then resuspended in 10-15 $\mu\text{l}$  dH<sub>2</sub>O and  
361 quantified with Qubit 3.0 fluorometer (Thermo Scientific) using the Qubit RNA HS  
362 Assay kit (Thermo Scientific). Small RNA libraries were prepared using the  
363 CleanTag™ Small RNA Library Preparation kit (Trilink) using manufacturer's  
364 instructions and 21 cycles. The libraries were size selected to include 145-160 bps  
365 and the input, IP-unbound and IP-bound libraries were pooled at a 1:1:2 ratio. The  
366 samples were sequenced using NovaSeq 50bp paired end sequencing at Edinburgh  
367 Genomics.

### 368 **Sequencing data analysis**

369 RNA sequencing data were processed to create miRNA count files. To assess the  
370 presence and counts of individual miRNAs, we used the miRNA counting tool  
371 QuickMIRSeq (Zhao et al., 2017). QuickMIRSeq does its own read trimming and  
372 length selection using cutadapt, which we set to trim the 3' adapter



373 TGGAATTCTCGGGTGCCAAGG, the 5' adapter AGATCGGAAGAGCACACGTCT,  
374 and choose only reads between 18 and 28 bp in length for assigning to known  
375 miRNAs. The default QuickMIRSeq settings were used for identifying mouse miRNAs.  
376 The QuickMIRSeq output file miR.filter.Counts.csv was used for all downstream  
377 analyses. The miRNA count files were then uploaded on the Degust (version 3.1.0)  
378 (Powell, 2015, DOI: 10.5281/zenodo.3258933) web tool for visualisation of differential  
379 expression analysis. The differential analysis was performed using the Voom/Limma  
380 method and visualised on Degust.

### 381 QUANTIFICATION AND STATISTICAL ANALYSIS

382 Statistical analysis was performed on GraphPad Prism. Details of statistical tests  
383 used, and number of biological and/or technical replicates can be found in the figure  
384 legends. Data are represented as mean and standard deviation. Statistical  
385 significance is defined as p-value <0.05.

### 386 Acknowledgements

387 M.T was supported by a doctoral training grant supported by the Biotechnology and  
388 Biological Sciences Research Council (BBSRC) BB/J01446X/1 and B/M010996/1.  
389 Research in Zamoyska lab is supported by WT205014/Z/16/Z and in the Buck lab by  
390 WT097394/Z/11/Z and Wellcome Trust-University of Edinburgh Institutional Strategic  
391 Support Fund ISSF3. We thank Prof. Dónal O'Carroll for the mouse Ago2 antibody.  
392 This work was supported by the Edinburgh Protein Production Facility (EPPF)  
393 and the Centre Core Grants (092076 and 203149) to the Wellcome Centre for Cell  
394 Biology at the University of Edinburgh. Sequencing was carried out by Edinburgh  
395 Genomics at the University of Edinburgh. Edinburgh Genomics is partly supported  
396 through core grants from NERC (R8/H10/56), MRC (MR/K001744/1) and BBSRC  
397 (BB/J004243/1). Flow cytometry data were generated within the Flow Cytometry and

398 Cell Sorting Facility in Ashworth, King's Buildings at the University of Edinburgh. The  
399 facility is supported by funding from Wellcome and the University of Edinburgh.

400

#### 401 REFERENCES

402 Behm-Ansmant, I., Rehwinkel, J., Doerks, T., Stark, A., Bork, P., and Izaurralde, E.  
403 (2006). mRNA degradation by miRNAs and GW182 requires both CCR4 : NOT  
404 deadenylase and DCP1 : DCP2 decapping complexes. *Genes Dev.* *20*, 1885-1898  
405 ST-MRNA degradation by miRNAs and GW1.

406 Bridge, K.S., Shah, K.M., Li, Y., Foxler, D.E., Wong, S.C.K., Miller, D.C., Davidson,  
407 K.M., Foster, J.G., Rose, R., Hodgkinson, M.R., et al. (2017). Argonaute Utilization  
408 for miRNA Silencing Is Determined by Phosphorylation-Dependent Recruitment of  
409 LIM-Domain-Containing Proteins. *Cell Rep.* *20*, 173–187.

410 Cibrian, D., Saiz, M.L., De La Fuente, H., Sánchez-Díaz, R., Moreno-Gonzalo, O.,  
411 Jorge, I., Ferrarini, A., Vázquez, J., Punzón, C., Fresno, M., et al. (2016). CD69  
412 controls the uptake of L-tryptophan through LAT1-CD98 and AhR-dependent  
413 secretion of IL-22 in psoriasis. *Nat. Immunol.* *17*, 985–996.

414 Dalmadi, Á., Gyula, P., Bálint, J., Szittyá, G., and Havelda, Z. (2019). AGO-unbound  
415 cytosolic pool of mature miRNAs in plant cells reveals a novel regulatory step at  
416 AGO1 loading. *Nucleic Acids Res.* *47*, 9803–9817.

417 Eulalio, A., Huntzinger, E., and Izaurralde, E. (2008). GW182 interaction with  
418 Argonaute is essential for miRNA-mediated translational repression and mRNA  
419 decay. *Nat. Struct. Mol. Biol.* *15*, 346–353.

420 Fabian, M.R., and Sonenberg, N. (2012). The mechanics of miRNA-mediated gene

- 421 silencing: A look under the hood of miRISC. *Nat. Struct. Mol. Biol.* *19*, 586–593.
- 422 Fang, Y., Xue, J., Shen, Q., Chen, J., and Tian, L. (2011). MicroRNA-7 Inhibits  
423 Tumor Growth and Metastasis by Targeting the Phosphoinositide 3-Kinase/Akt  
424 Pathway in Hepatocellular Carcinoma. 1852–1862.
- 425 Flores, O., Kennedy, E.M., Skalsky, R.L., and Cullen, B.R. (2014). Differential RISC  
426 association of endogenous human microRNAs predicts their inhibitory potential.  
427 *Nucleic Acids Res.* *42*, 4629–4639.
- 428 Gagnon, J.D., and Ansel, K.M. (2019). MicroRNA regulation of CD8+ T cell  
429 responses. *Non-Coding RNA Investig.* *3*, 24–24.
- 430 Gaud, G., Lesourne, R., and Love, P.E. (2018). Regulatory mechanisms in T cell  
431 receptor signalling. *Nat. Rev. Immunol.* *18*, 485–497.
- 432 Gebert, L.F.R., and MacRae, I.J. (2019). Regulation of microRNA function  
433 in animals. *Nat. Rev. Mol. Cell Biol.* *20*, 21–37.
- 434 Golden, R.J., Chen, B., Li, T., Braun, J., Manjunath, H., Chen, X., Wu, J., Schmid,  
435 V., Chang, T., Kopp, F., et al. (2017). An Argonaute phosphorylation cycle promotes  
436 microRNA-mediated silencing. *Nat. Publ. Gr.* *542*, 197–202.
- 437 Höck, J., Weinmann, L., Ender, C., Rüdell, S., Kremmer, E., Raabe, M., Urlaub, H.,  
438 and Meister, G. (2007). Proteomic and functional analysis of Argonaute-containing  
439 mRNA-protein complexes in human cells. *EMBO Rep.* *8*, 1052–1060.
- 440 Hogquist, K.A., Jameson, S.C., Heath, W.R., Howard, J.L., Bevan, M.J., and  
441 Carbone, F.R. (1994). T cell receptor antagonist peptides induce positive selection.  
442 *Cell* *76*, 17–27.

- 443 Horman, S.R., Janas, M.M., Litterst, C., Wang, B., MacRae, I.J., Sever, M.J.,  
444 Morrissey, D. V., Graves, P., Luo, B., Umesalma, S., et al. (2013). Akt-mediated  
445 phosphorylation of argonaute 2 downregulates cleavage and upregulates  
446 translational repression of MicroRNA targets. *Mol. Cell* 50, 356–367.
- 447 Howden, A.J.M., Hukelmann, J.L., Brenes, A., Spinelli, L., Sinclair, L. V., Lamond,  
448 A.I., and Cantrell, D.A. (2019). Quantitative analysis of T cell proteomes and  
449 environmental sensors during T cell differentiation. *Nat. Immunol.*
- 450 Khan, A. a., Penny, L. a., Yuzefpolskiy, Y., Sarkar, S., and Kalia, V. (2013).  
451 MicroRNA-17~92 regulates effector and memory CD8 T-cell fates by modulating  
452 proliferation in response to infections. *Blood* 121, 4473–4483.
- 453 Kim, H.P., Imbert, J., and Leonard, W.J. (2006). Both integrated and differential  
454 regulation of components of the IL-2/IL-2 receptor system. *Cytokine Growth Factor*  
455 *Rev.* 17, 349–366.
- 456 Krol, J., Loedige, I., and Filipowicz, W. (2010). The widespread regulation of  
457 microRNA biogenesis, function and decay. *Nat. Rev. Genet.* 11, 597–610.
- 458 Landthaler, M., Gaidatzis, D., Rothballer, A., Chen, P.Y., Soll, S.J., Dinic, L., Ojo, T.,  
459 Hafner, M., Zavolan, M., and Tuschl, T. (2008). Molecular characterization of human  
460 Argonaute-containing ribonucleoprotein complexes and their bound target mRNAs.  
461 *RNA* 14, 2580–2596.
- 462 Lazzaretti, D., Tournier, I., and Izaurralde, E. (2009). The C-terminal domains of  
463 human TNRC6A, TNRC6B, and TNRC6C silence bound transcripts independently of  
464 Argonaute proteins. *Rna* 15, 1059–1066.

- 465 Lian, S.L., Li, S., Abadal, G.X., Pauley, B.A., Fritzler, M.J., and Chan, E.K.L. (2009).  
466 The C-terminal half of human Ago2 binds to multiple GW-rich regions of GW182 and  
467 requires GW182 to mediate silencing. *RNA* 15, 804–813.
- 468 Miyazawa, M., Bogdan, A.R., Hashimoto, K., and Tsuji, Y. (2018). Regulation of  
469 transferrin receptor-1 mRNA by the interplay between IRE-binding proteins and miR-  
470 7/miR-141 in the 3'-IRE stem-loops. *Rna* 24, 468–479.
- 471 Nguyen, H.T.T., Dalmasso, G., Yan, Y., Laroui, H., Dahan, S., Mayer, L., Sitaraman,  
472 S. V., and Merlin, D. (2010). MicroRNA-7 modulates CD98 expression during  
473 intestinal epithelial cell differentiation. *J. Biol. Chem.* 285, 1479–1489.
- 474 Olejniczak, S.H., La Rocca, G., Gruber, J.J., and Thompson, C.B. (2013). Long-lived  
475 microRNA-Argonaute complexes in quiescent cells can be activated to regulate  
476 mitogenic responses. *Proc. Natl. Acad. Sci. U. S. A.* 110, 157–162.
- 477 Powell, B.H., Turchinovich, A., Wang, Y., Liao, Z., Dar, M.A., La Rocca, G., Umanah,  
478 G.E., Zeiger, M.A., Umbricht C.B., Witwer K.W. (2020). mir-21 is associated with inactive low  
479 molecular weight Argonaute complexes in thyroid cancer cell lines. *BioRxiv*.  
doi.org/10.1101/2020.03.24.006072
- 480 Preston, G.C., Sinclair, L. V, Kaskar, A., Hukelmann, J.L., Navarro, M.N., Ferrero, I.,  
481 MacDonald, H.R., Cowling, V.H., and Cantrell, D.A. (2015). Single cell tuning of Myc  
482 expression by antigen receptor signal strength and interleukin-2 in T lymphocytes.  
483 *EMBO J.* 34, 2008–2024.
- 484 La Rocca, G., Olejniczak, S.H., González, A.J., Briskin, D., Vidigal, J.A., Spraggon,  
485 L., DeMatteo, R.G., Radler, M.R., Lindsten, T., Ventura, A., et al. (2015). In vivo,  
486 Argonaute-bound microRNAs exist predominantly in a reservoir of low molecular  
487 weight complexes not associated with mRNA. *Proc. Natl. Acad. Sci.* 112, 767–772.

- 488 Rodríguez-galán, A., Fernández-messina, L., and Sánchez-madrid, F. (2018).  
489 Control of Immunoregulatory Molecules by miRNAs in T Cell Activation. *Front.*  
490 *Immunol.* 9, 2148.
- 491 Rollings, C.M., Sinclair, L. V., Brady, H.J.M., Cantrell, D.A., and Ross, S.H. (2018).  
492 Interleukin-2 shapes the cytotoxic T cell proteome and immune environment–sensing  
493 programs. *Sci. Signal.* 11.
- 494 Ross, S.H., and Cantrell, D.A. (2018). Signaling and Function of Interleukin-2 in T  
495 Lymphocytes. *Annu. Rev. Immunol.* 36, 411–433.
- 496 Rüdél, S., Wang, Y., Lenobel, R., Körner, R., Hsiao, H.H., Urlaub, H., Patel, D., and  
497 Meister, G. (2011). Phosphorylation of human Argonaute proteins affects small RNA  
498 binding. *Nucleic Acids Res.* 39, 2330–2343.
- 499 Sandberg, R., Neilson, J.R., Sarma, A., Sharp, P.A., and Burge, C.B. (2008).  
500 Proliferating Cells Express mRNAs with Shortened 3' Untranslated Regions and  
501 Fewer MicroRNA Target Sites. *Science* (80-. ). 320, 1643–1647.
- 502 Schmolka, N., Papotto, P.H., Romero, P.V., Amado, T., Enguita, F.J., Amorim, A.,  
503 Rodrigues, A.F., Gordon, K.E., Coroadinha, A.S., Boldin, M., et al. (2018).  
504 MicroRNA-146a controls functional plasticity in T cells by targeting NOD1. *Sci.*  
505 *Immunol.* 3, 1–14.
- 506 Sinclair, L. V., Rolf, J., Emslie, E., Shi, Y.B., Taylor, P.M., and Cantrell, D.A. (2013).  
507 Control of amino-acid transport by antigen receptors coordinates the metabolic  
508 reprogramming essential for T cell differentiation. *Nat. Immunol.* 14, 500–508.
- 509 Wang, Y., Liu, J., Liu, C., Najj, A., and Stoffers, D.A. (2013). MicroRNA-7 Regulates

510 the mTOR Pathway and Proliferation in Adult Pancreatic  $\beta$ -Cells. *Diabetes* 62, 887–  
511 895.

512 Wherry, E.J., and Kurachi, M. (2015). Molecular and cellular insights into T cell  
513 exhaustion. *Nat. Rev. Immunol.* 15, 486–499.

514 Wu, P.-H., Isaji, M., and Carthew, R.W. (2013). Functionally diverse microRNA  
515 effector complexes are regulated by extracellular signaling. *Mol. Cell* 52, 113–123.

516 Wu, T., Wieland, a., Araki, K., Davis, C.W., Ye, L., Hale, J.S., and Ahmed, R.  
517 (2012). Temporal expression of microRNA cluster miR-17-92 regulates effector and  
518 memory CD8<sup>+</sup> T-cell differentiation. *Proc. Natl. Acad. Sci.* 109, 9965–9970.

519 Zeng, Y., Sankala, H., Zhang, X., and Graves, P.R. (2008). Phosphorylation of  
520 Argonaute 2 at serine-387 facilitates its localization to processing bodies. *Biochem.*  
521 *J.* 413, 429–436.

522 Zhao, J., Tao, Y., Zhou, Y., Qin, N., Chen, C., Tian, D., and Xu, L. (2015).  
523 MicroRNA-7: A promising new target in cancer therapy. *Cancer Cell Int.* 15, 1–8.

524 Zhao, S., Gordon, W., Du, S., Zhang, C., He, W., Xi, L., Mathur, S., Agostino, M.,  
525 Paradis, T., von Schack, D., et al. (2017). QuickMIRSeq: A pipeline for quick and  
526 accurate quantification of both known miRNAs and isomiRs by jointly processing  
527 multiple samples from microRNA sequencing. *BMC Bioinformatics* 18, 1–14.

528

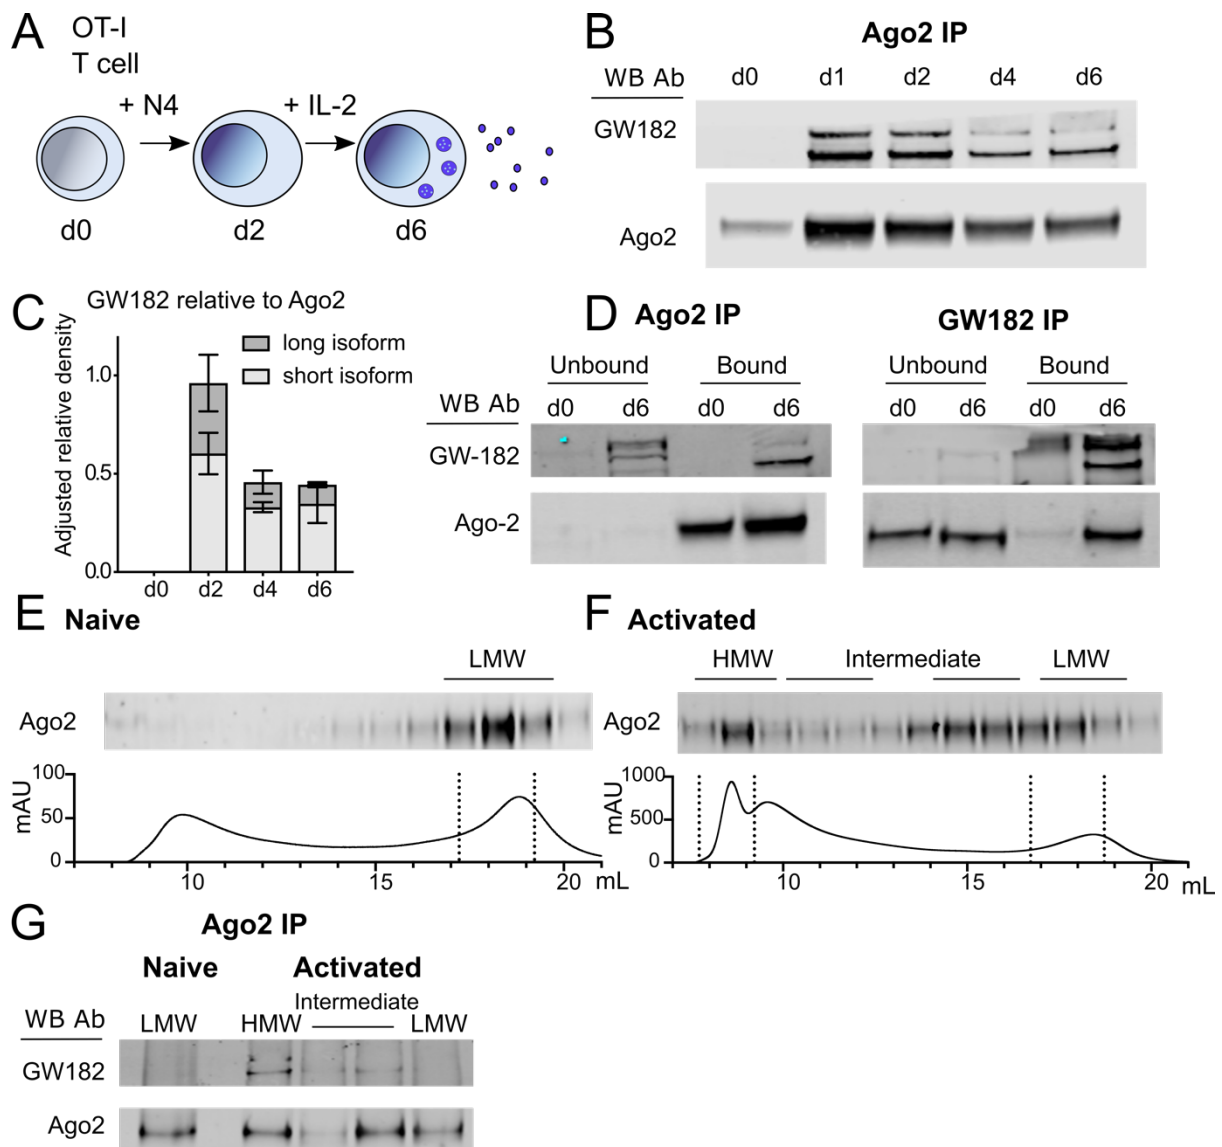

Figure 1 Ago2 forms HMW RISC with GW182 in activated CD8<sup>+</sup> T cells

(A) Schematic of *in vitro* activation of OT-I CD8<sup>+</sup> T cells with N4 and differentiation to cytotoxic effector cells with IL-2.

(B-C) Ago2 was immunoprecipitated from cell lysates ( $2 \times 10^7$  cells) collected from a time-course of CD8<sup>+</sup> T cell activation and western blots were probed with Ago2 and GW182 antibodies (A). Quantification of the western blots measured on a Li-cor imager as GW182 band intensity relative to Ago2 band intensity, shown normalised to expression of Ago2 on d2 (B). Mean and range from 2 independent experiments.

(D) Western blot from Ago2 and GW182 IPs showing bound and unbound fractions, from naive and d6 activated CD8<sup>+</sup> T cell lysates ( $2 \times 10^7$  cells per IP), probed with Ago2 and GW182 antibodies as indicated.

(E-F) Size exclusion chromatography fractions from naive (D) and d2 activated (E) CD8<sup>+</sup> T cell lysates ( $8 \times 10^7$  cells). Protein elution curves show fraction volume (in mL) and absorption at 280 nm (in milli-Absorption Units). Western blot from precipitated protein from fractions probed with Ago2 antibody.

(G) Ago2 IP from HMW, intermediate and LMW fractions pooled together as indicated on western blots and elution curves. Western blot of IP samples probed with Ago2 and GW182 antibodies.



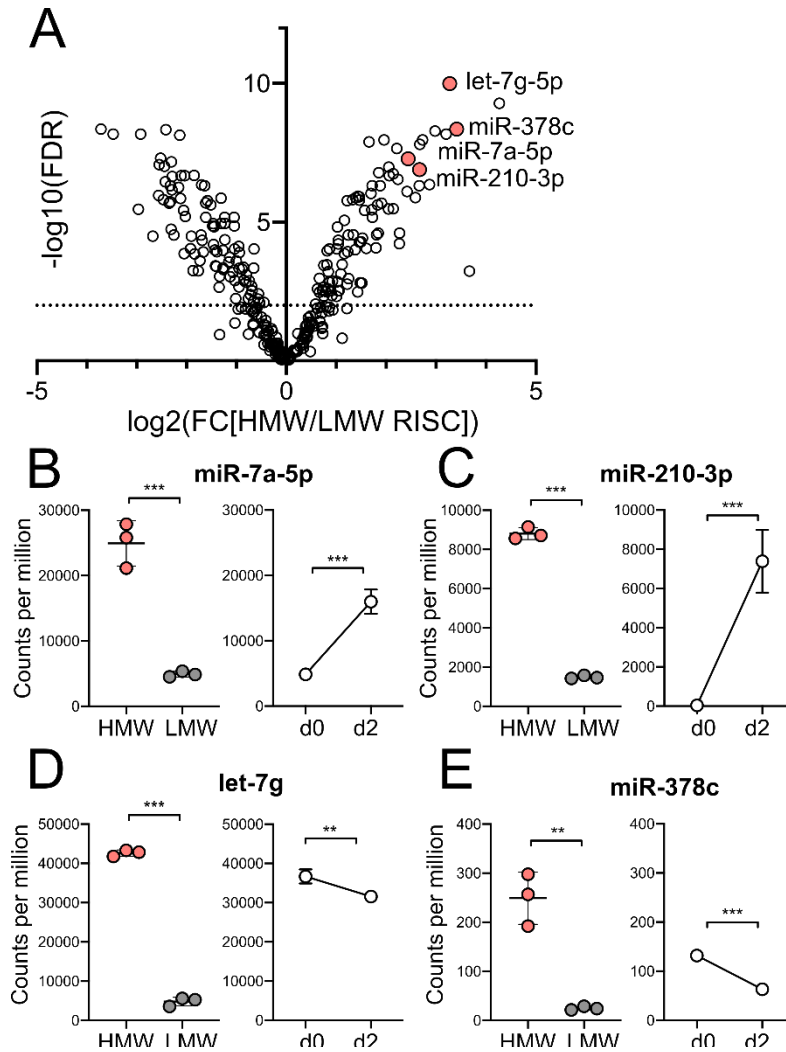

Figure 2 Specific miRNAs are found significantly enriched in HMW RISC in activated CD8<sup>+</sup> T cells

(A) Differential expression of miRNAs between HMW and LMW RISC shown in a volcano plot of log<sub>2</sub> fold change expression in HMW vs LMW RISC and -log<sub>10</sub> of false discovery rate. Significant differences (FDR<0.01) above dashed line.

(B-E) Counts per million (CPM) of miRNAs in HMW and LMW RISC in d2 activated cells. Expression change is shown as CPM in Ago2 IP from naive and d2 activated cells. Data are from three biological replicates in one experiment. Statistical analysis was performed using a two-tailed unpaired student's t-test.

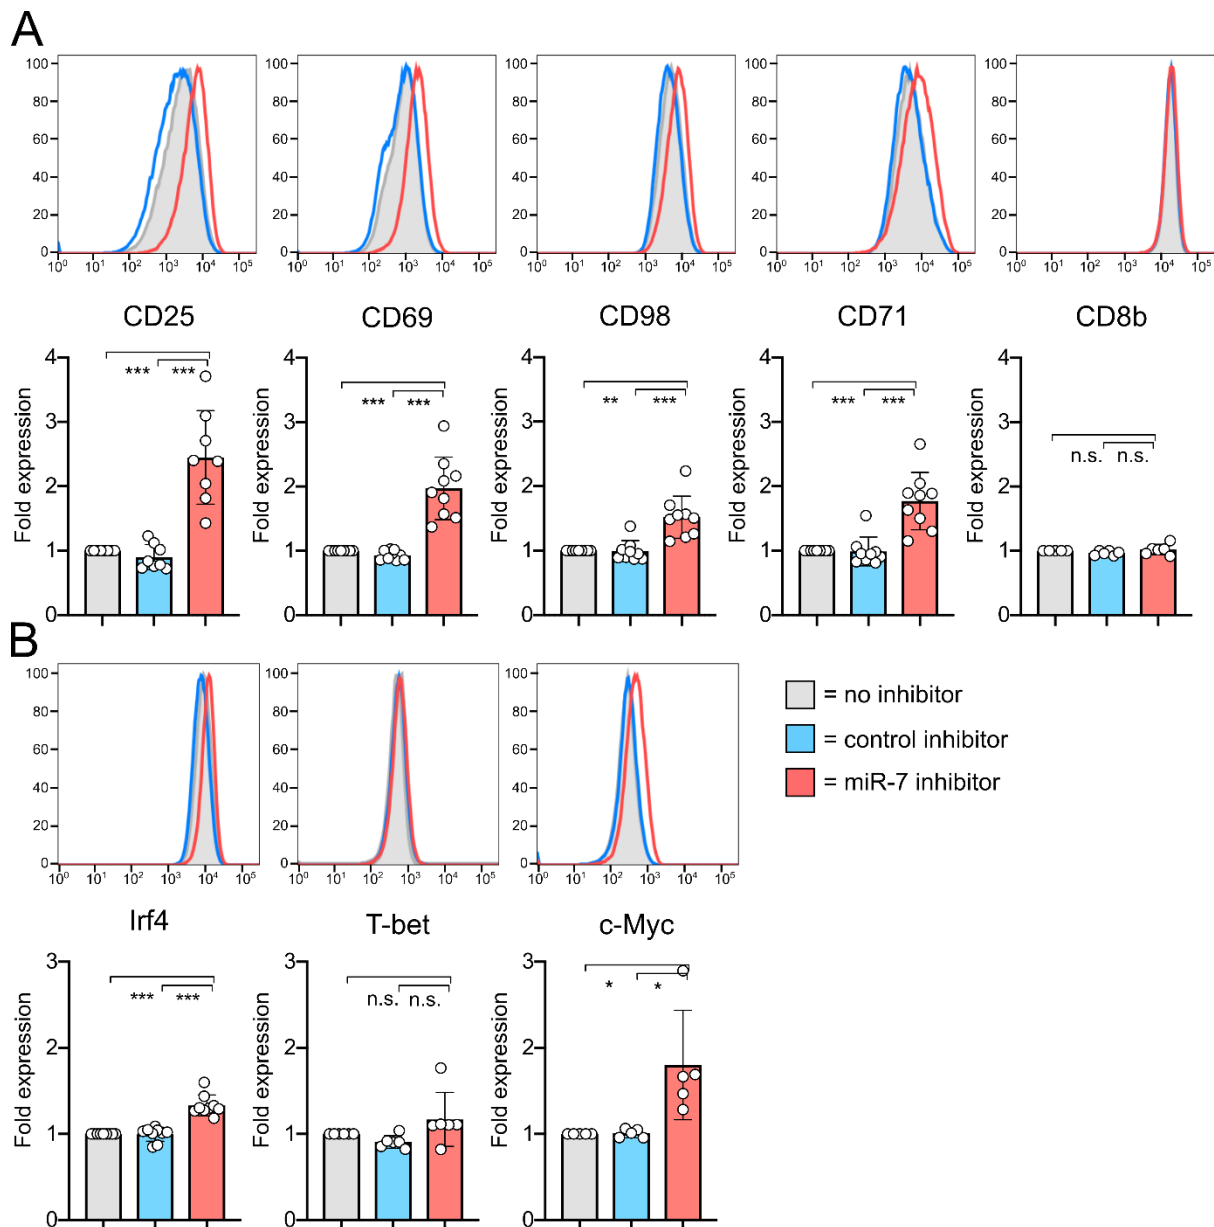

Figure 3 Inhibition of miR-7 during T cell activation results in altered cell phenotype (A) Cells were activated with N4 peptide in the presence of miR-7 inhibitor and expression of surface markers (A) and transcription factors (B) was measured on d2. Representative flow cytometry histograms are shown with graphs showing individual biological replicates pooled from 4-6 independent experiments, with fold expression shown relative to 'no inhibitor' control. Statistical analysis was performed using a one-sample t-test to compare 'miR-7 inhibitor' to the hypothetical mean of 1 and a two-tailed unpaired student's t-test to compare 'control inhibitor' and 'miR-7 inhibitor' conditions.

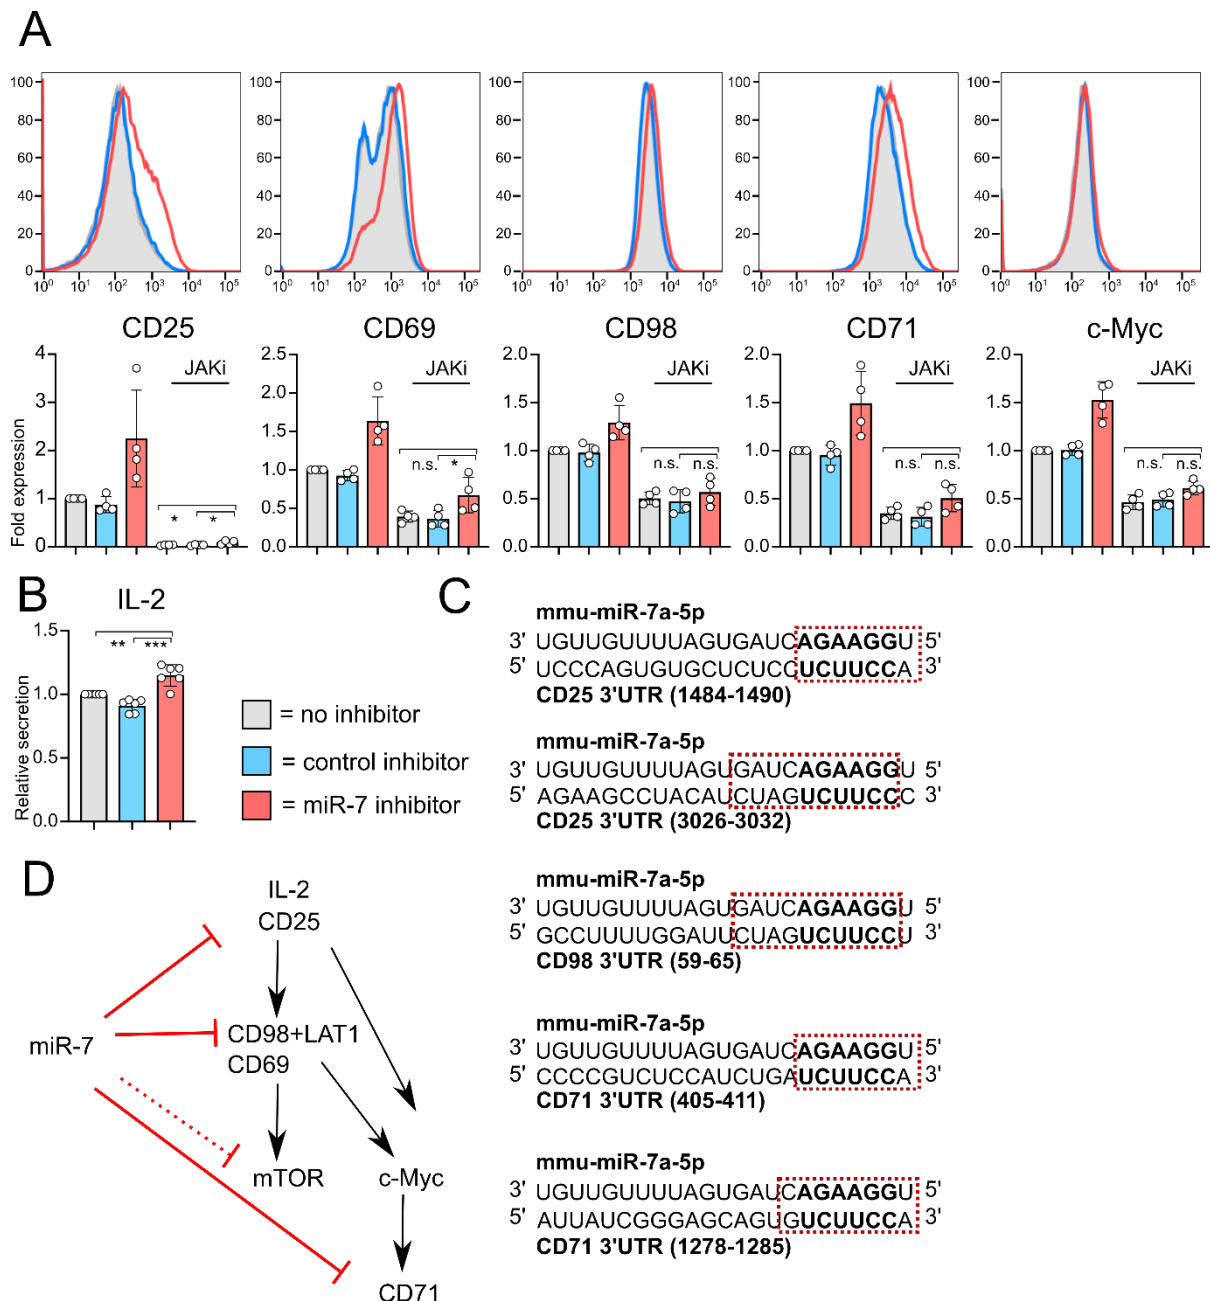

**Figure 4** Blockade of JAK signalling only partially abrogates miR-7 inhibition  
 (A) Cells were activated with N4 peptide  $\pm$  miR-7 or control inhibitor. JAK inhibitor (tofacitinib) was added on d1. Expression of surface markers and transcription factors was measured on d2. Representative flow cytometry histograms are shown with pooled data from 4 independent experiments. No JAK inhibitor data are reprised from Figure 4. Fold expression is shown relative to 'no inhibitor' control. Statistical analysis was performed using a one-way ANOVA with Tukey's multiple comparisons test, to compare the JAK inhibitor treated conditions.

(B) IL-2 secreted on d1, measured by ELISA from culture supernatants. IL-2 receptor blocking antibody was included in cultures to prevent uptake and depletion of IL-2 by the T cells. The graph is showing six biological replicates from three independent experiments, as IL-2 secretion (measured in pg/mL from culture supernatant) relative to 'no inhibitor' control. Statistical analysis was performed using a one-sample t-test to

compare 'miR-7 inhibitor' to the hypothetical mean of 1 and a two-tailed unpaired student's t-test to compare 'control inhibitor' and 'miR-7 inhibitor' conditions.

(C) miR-7 target site location in 3'UTR of CD25, CD98 and CD71. The 6-mer seed site is shown in bold and other matching nucleotides are shown within the red square.

(D) Schematic of proposed mechanism of action of miR-7 in CD8<sup>+</sup> T cells.

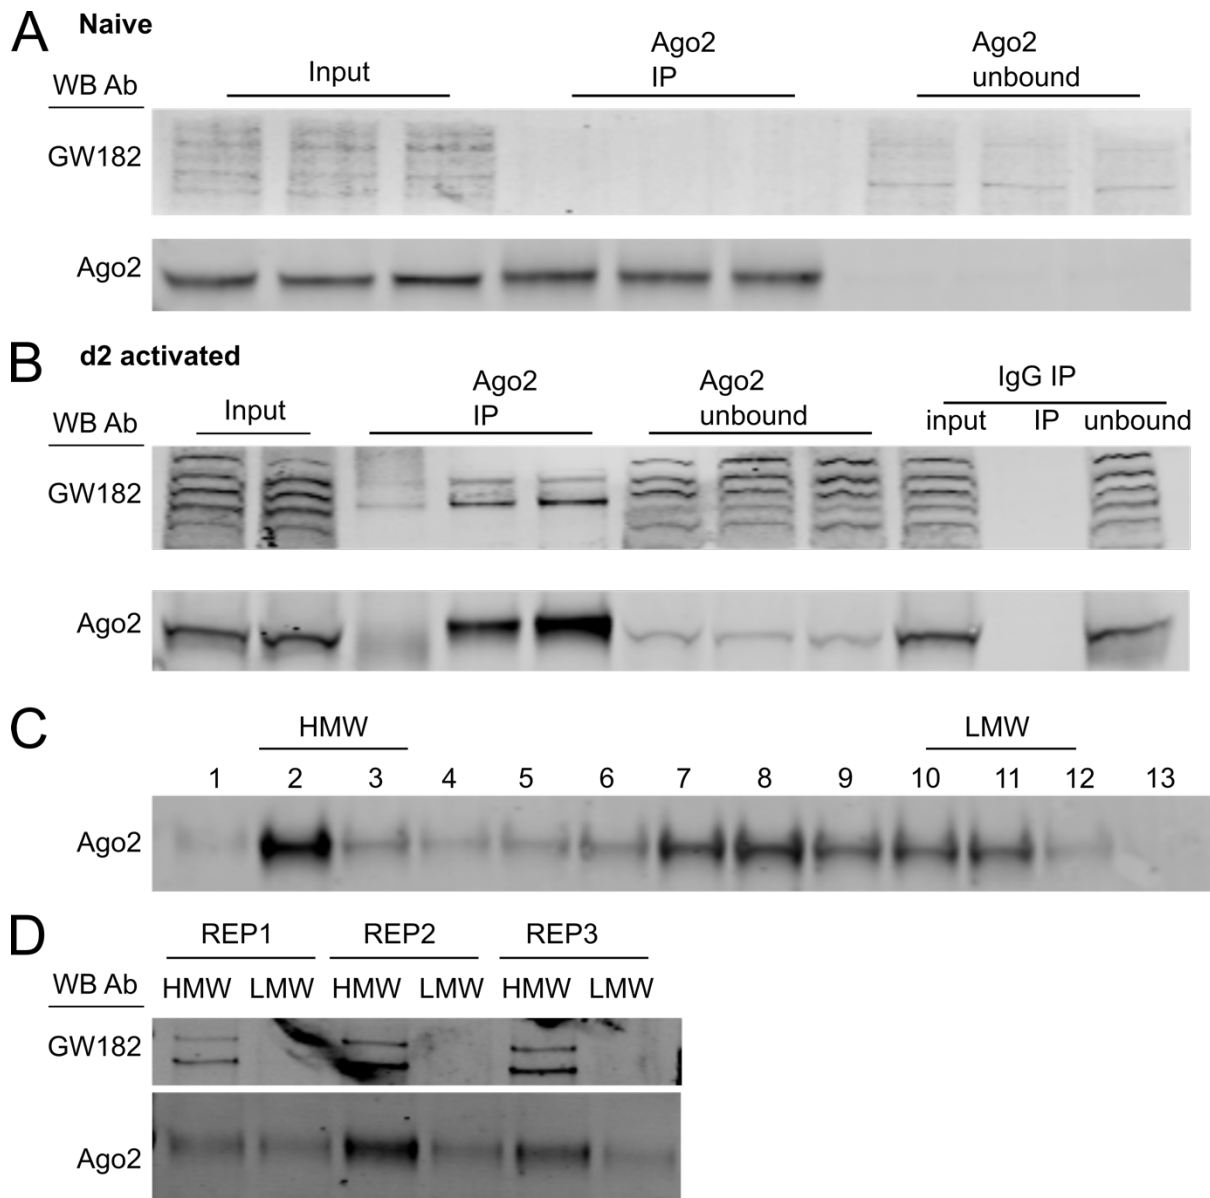

Supplementary Figure 1 Ago2 IPs for preparation of small RNA libraries from HMW and LMW RISC

(A-B) Western blots from input, Ago2 IP (and control IgG IP) and unbound fractions from naive (A) and d2 activated (B) OT-I T cells. Blots are probed with Ago2 and GW182 antibodies. Three biological replicates are shown for naive and activated cells.

(C) Western blot from protein fractions eluted by size exclusion chromatography, probed with Ago2 antibody. One replicate is shown as representative of three.

(D) Western blot of Ago2 IP from pooled HMW (lanes 2-3 in C) and LMW (lanes 10-12 in C) fractions, probe with Ago2 and GW182 antibodies. Three biological replicates are shown.

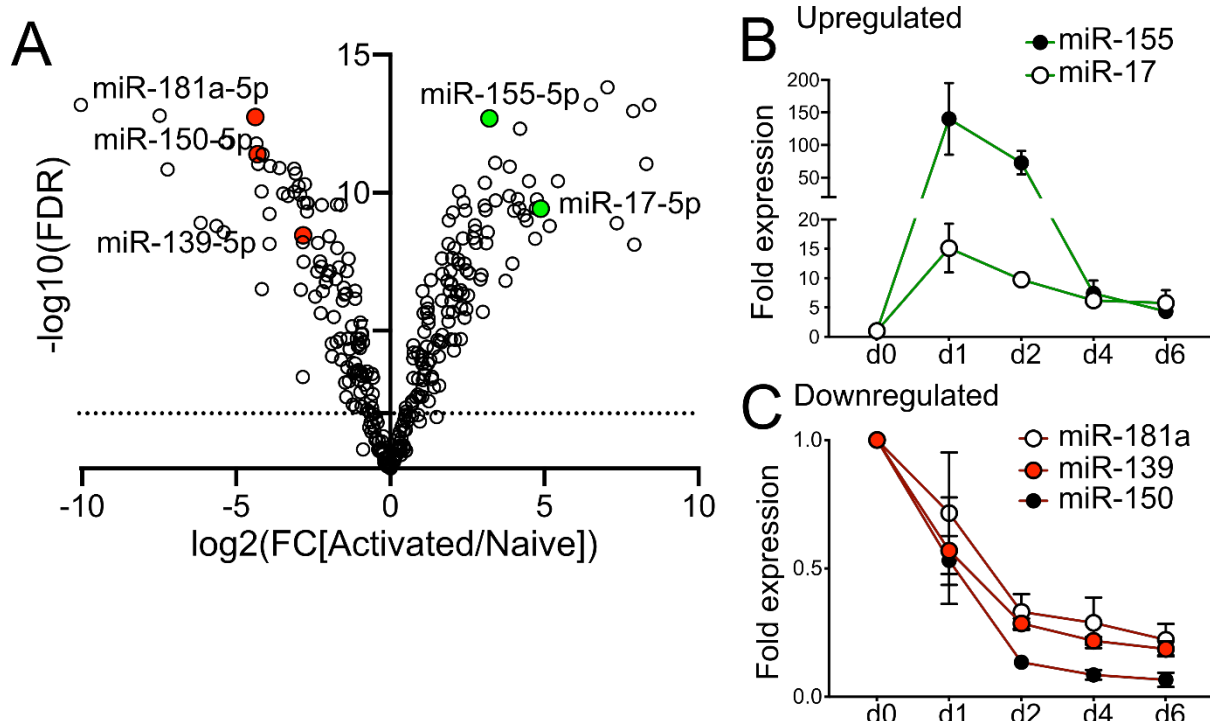

Supplementary Figure 2 miRNA expression changes dynamically upon CD8<sup>+</sup> T cell activation

(A) Differential expression of Ago2 bound miRNAs between naive and d2 activated OT-I T cells shown in a volcano plot of  $\log_2$  fold change expression in naive vs activated cells and  $-\log_{10}$  of false discovery rate. Significant differences (FDR<0.01) above dashed line. Data are from three biological replicates in one experiment.

(B-C) miRNA expression measured by qPCR shown as fold expression relative to naive cells. Mean and SD from 3-4 independent experiments.

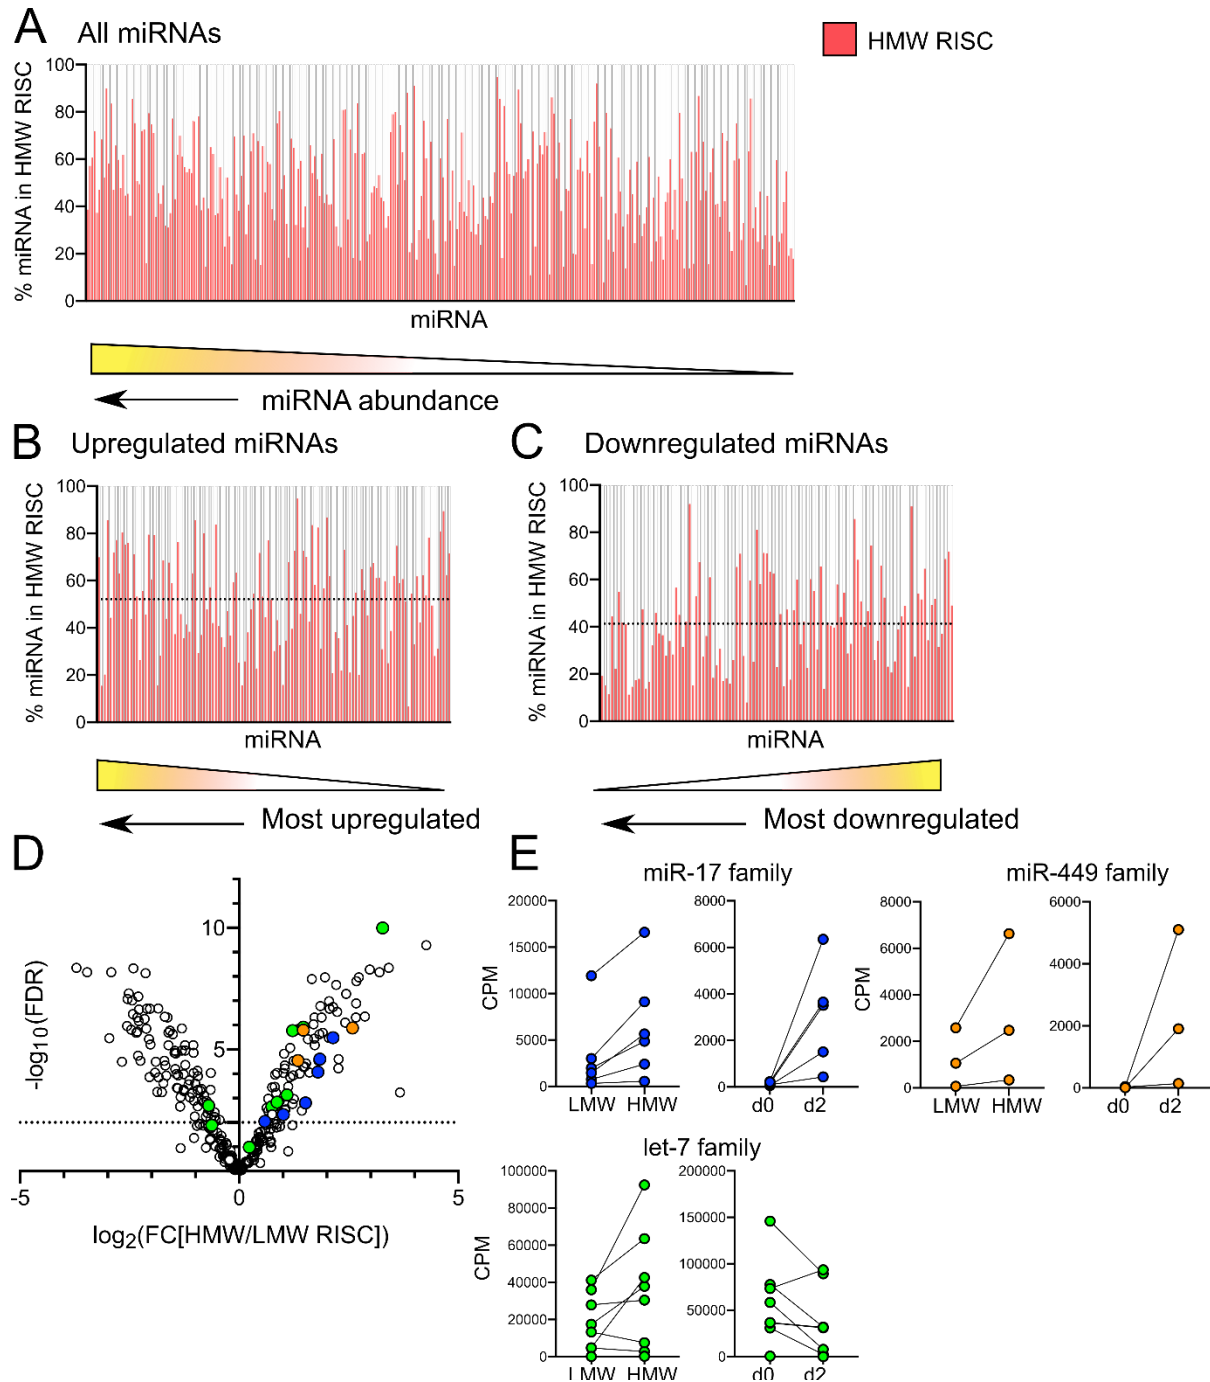

Supplementary Figure 3 miRNA distribution between HMW and LMW RISC does not correlate with miRNA abundance

(A-C) Ratio of miRNA in HMW RISC calculated as CPM in HMW RISC over sum of CPM in HMW and LMW RISC. (A) is ranked by miRNA abundance in Ago2 IP, (B) by level of miRNA upregulation and (C) by level of miRNA downregulation. Dashed lines indicate average proportion of miRNA found in HMW RISC, 52% in (B) and 41% in (C).

(D) Differential expression of miRNAs between HMW and LMW RISC shown in a volcano plot of  $\log_2$  fold change expression of HMW vs LMW RISC and  $-\log_{10}$  of false discovery rate. Significant differences ( $FDR < 0.01$ ) above dashed line. Members of the miR-17 family (in blue: miR-17-5p, miR-20a-5p, miR-20b-5p, miR-106a-5p, miR-106b-5p and miR-93-5p), let-7 family (in green: let-7a-5p, let-7b-5p, let-7c-5p, let-7d-5p, let-

7e-5p, let-7f-5p, let-7g-5p, let-7i-5p, let-7j) and miR-449 family (in orange: miR-449a-5p, miR-449c-5p, miR-34a-5p) are highlighted.

(E) CPM of miRNAs belonging to miR-17, miR-449 and let-7 families in HMW and LMW RISC in d2 activated cells. Expression change is shown as CPM in Ago2 IP from naive and d2 activated cells. Data are from three biological replicates in one experiment.



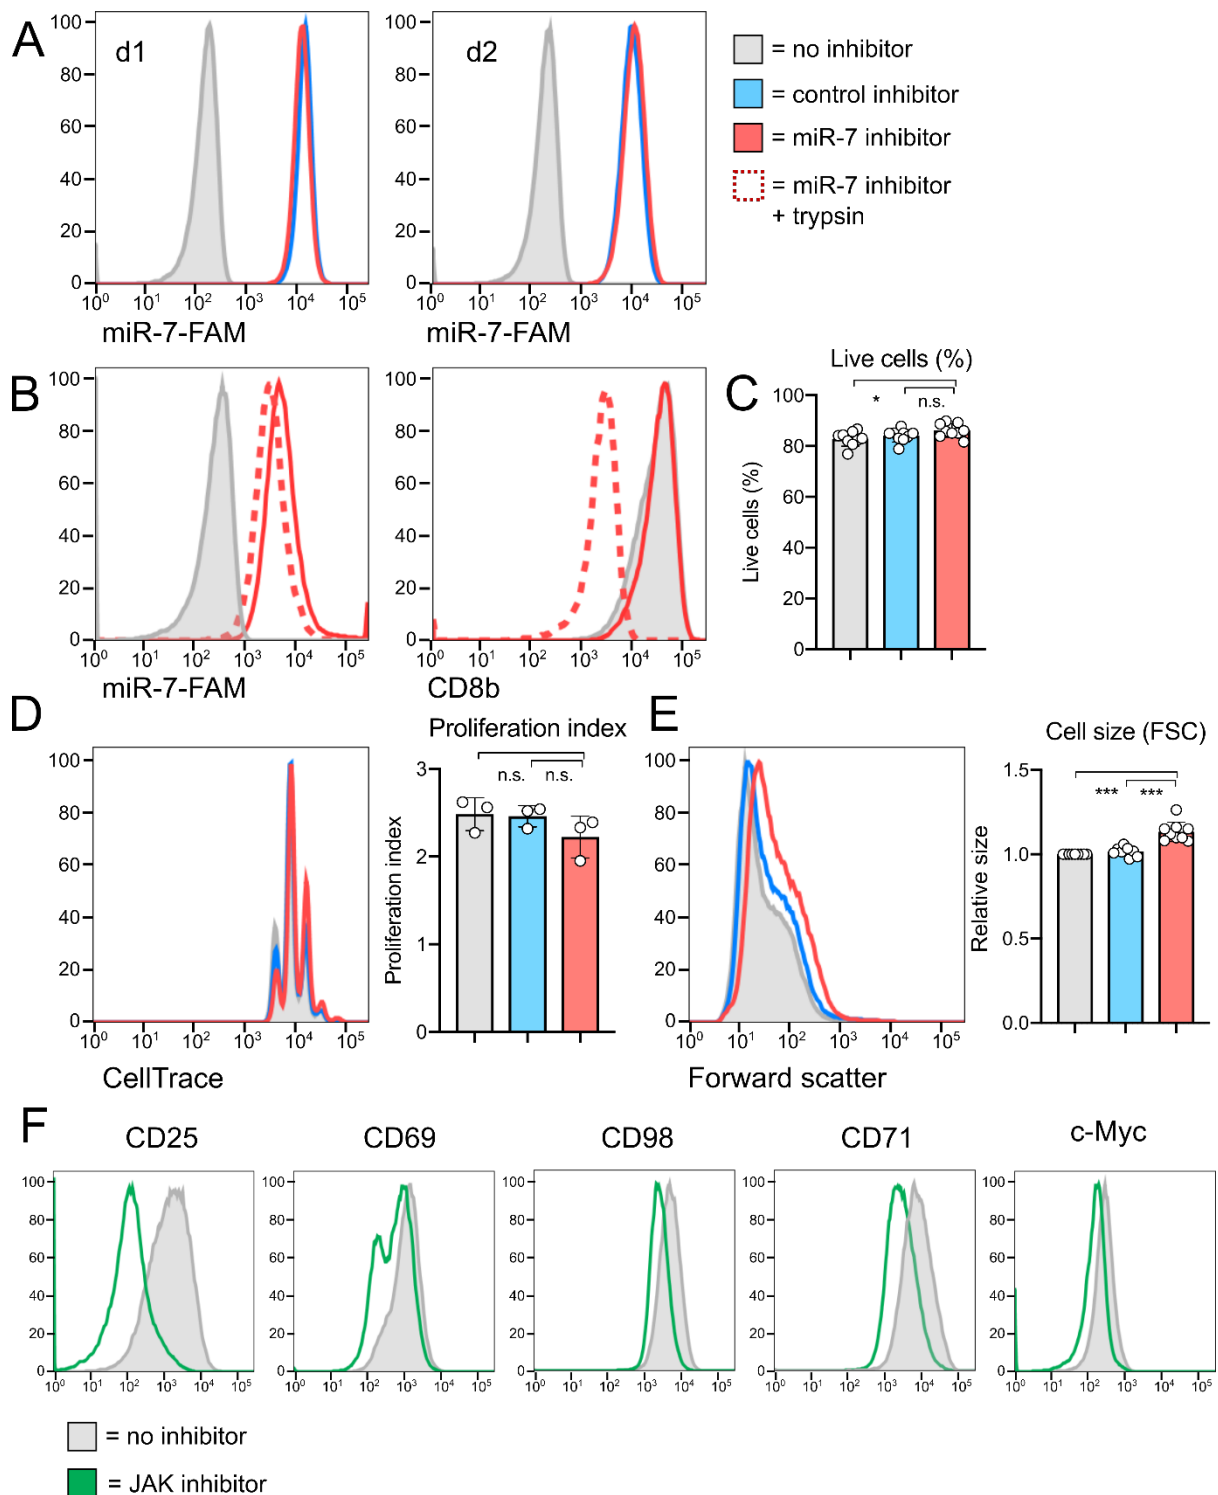

Supplementary Figure 4 Uptake of the miR-7 inhibitor does not affect cell viability, proliferation and size

(A-B) Cells were activated with N4 in the presence of a fluorescently tagged miR-7 inhibitor. Uptake was measured by flow cytometry on d1 and d2 (A), with or without a pre-incubation with trypsin (B).

(C) Percentage of live cells on d2 measured using a live/dead cell stain.

(D) Cell proliferation measured by dilution of a CellTrace tracker dye on d2. Representative flow cytometry histogram is shown alongside proliferation index measured from three independent experiments.

(E) Cell size measured by forward scatter in flow cytometry, shown relative to 'no inhibitor' control. Graph is showing individual biological replicates from 4-6 independent experiments, with fold expression shown relative to 'no inhibitor' control. Statistical analysis was performed using a one-sample t-test to compare 'miR-7 inhibitor' to the hypothetical mean of 1 and a two-tailed unpaired student's t-test to compare 'control inhibitor' and 'miR-7 inhibitor' conditions.

(F) Cells were activated with N4 on d0 and JAK inhibitor was added on d1. Expression of surface markers and transcription factors was measured on d2. Representative flow cytometry histograms (from four independent experiments) show effect of JAK inhibitor compared to no inhibitor control.
